# Supplementary material
Source: Springer Nature journal article supplement (https://www.springermedizin.de/resource/supplementary/12936_2008_547_MOESM1_ESM.pdf/9548260)
Supplement: MOESM1 [file 9548260]

| TIGR      | Upstream |      |      |      |      |      |      |      |      |      |      |     | dhfr |       |    |    |     | Downstream |      |      |      |      |      |   |
|-----------|----------|------|------|------|------|------|------|------|------|------|------|-----|------|-------|----|----|-----|------------|------|------|------|------|------|---|
|           | indel    | -753 | -712 | -689 | -679 | -633 | -632 | -581 | -497 | -245 | -223 | -62 | dhfr | indel | 69 | 93 | 173 | 199        | +223 | +260 | +383 | +483 | +586 |   |
| Nic MR4   | A        |      |      |      |      |      |      |      |      |      |      | G   | FSTS |       | Y  | S  | I   | A          | G    | G    |      |      |      |   |
| Pan MR4   | A        |      |      |      |      |      |      |      |      |      |      | G   | FSTS |       |    |    |     |            |      |      |      |      |      |   |
| Viet MR4  | A        |      |      |      |      |      |      |      |      |      |      | G   | FSTS |       |    |    |     |            |      |      |      |      |      |   |
| India (1) | A        |      |      |      |      |      |      |      | C    |      |      | G   | FSTS |       |    |    |     |            |      |      |      |      |      |   |
| India (6) | A        |      |      |      |      |      |      |      |      |      |      | G   | FSTS |       |    |    |     |            |      |      |      |      |      |   |
| India (2) | A        |      |      |      |      |      |      |      |      |      |      | G   | FSTS |       |    |    |     |            | A    |      |      |      |      |   |
| India (1) | A        |      |      |      |      |      |      |      |      |      |      | G   | FSTS |       |    |    |     |            |      |      |      | T    |      |   |
| India (1) | A        |      |      |      |      |      |      |      |      |      |      | G   | FSTS |       |    |    |     |            |      |      |      |      |      |   |
| India (3) | A        |      |      |      |      |      |      |      |      |      |      | G   | FSTS |       |    | H  |     |            |      |      |      |      |      |   |
| SL (2)    | A        |      |      |      |      |      |      |      |      |      |      | G   | FSTS |       |    |    |     |            |      |      |      |      |      |   |
| SL (3)    | A        |      |      |      |      |      |      |      |      |      |      | G   | FSTS |       | Y  |    |     |            |      |      |      |      |      |   |
| SL (1)    | E        |      |      |      |      |      |      |      |      |      |      | G   | FSTS |       | Y  |    |     |            |      |      |      |      |      |   |
| SL (2)    | A        |      |      |      |      |      |      |      |      |      |      | G   | FSTS |       |    |    |     |            |      |      |      |      |      |   |
| SL (1)    | A        |      |      |      |      |      |      |      |      |      |      | G   | FSTS | 2     |    |    |     |            |      |      |      |      |      |   |
| SL (1)    | A        |      |      |      |      |      |      |      |      |      |      | G   | FSTS | 4     |    |    |     |            |      |      |      |      | TTT  |   |
| Indo (1)  |          |      |      |      |      |      |      |      |      |      |      | G   | FSTS |       |    |    |     |            |      |      |      |      |      |   |
| Indo (1)  |          |      | T    |      |      |      |      |      |      |      |      | G   | FSTS |       |    |    |     |            |      |      |      |      |      |   |
| Indo (1)  | A        | C    |      |      |      |      |      |      |      |      |      | G   | FSTS |       |    |    |     |            |      |      |      |      |      |   |
| Indo (1)  | A        |      |      |      |      | A    |      |      |      |      |      | G   | FSTS |       |    |    |     |            |      |      |      |      |      |   |
| Indo (1)  | A        |      |      |      |      |      |      |      |      |      |      | G   | FSTS |       |    |    |     |            | A    |      |      |      |      |   |
| Indo (1)  |          |      |      |      |      |      |      |      |      |      |      | G   | FSTS |       |    |    |     |            |      |      |      |      | TTT  |   |
| Indo (1)  | A        |      |      |      |      |      |      |      |      |      |      | G   | FSTN | 3     |    |    |     |            |      |      |      |      |      |   |
| SL (3)    | A        |      |      |      |      |      |      |      |      |      |      | G   | FSTN | 2     | Y  |    |     |            |      |      |      |      | TTT  |   |
| SL (3)    | A        |      |      |      |      |      |      |      |      |      |      | G   | LRTS |       |    |    |     |            | T    |      |      |      |      |   |
| PNG (1)   | A        |      |      |      |      |      |      |      |      |      |      | G   | LRTS | 2     |    |    |     |            |      |      |      |      |      |   |
| Indo (3)  | A        |      |      |      |      |      |      |      |      |      |      | G   | FRTN |       |    |    |     | V          |      |      |      |      |      |   |
| Col (8)   | B        |      |      |      |      |      |      |      |      |      |      | G   | FRTN | 1     |    |    |     |            |      |      |      |      |      |   |
| Col (1)   | A        |      |      |      |      |      |      |      |      |      |      | G   | FRTN |       |    |    |     |            |      |      |      |      |      |   |
| Thai MR4  | A        |      |      |      |      |      |      |      |      |      |      | G   | FRTN | 1     |    |    |     |            |      |      |      |      | TTT  |   |
| Thai (7)  | A        |      |      |      |      |      |      |      |      |      |      | G   | FRTN | 1     |    |    |     |            |      |      |      |      | TTT  |   |
| Thai (2)  | A        |      |      |      |      |      |      |      |      |      |      | G   | FRTN | 1     |    |    |     |            |      |      |      |      |      |   |
| India (8) | A        |      |      |      |      |      |      |      |      |      |      | G   | FRTN |       |    |    |     |            |      |      |      |      |      |   |
| India (2) | A        |      |      |      |      |      |      |      |      |      |      | G   | FRTN |       |    |    |     |            |      |      |      |      |      |   |
| Indo (6)  | A        |      |      |      |      |      |      |      |      |      |      | G   | FRTN | 1     |    |    |     |            |      |      |      |      | TTT  |   |
| Indo (1)  | A        |      |      |      |      | A    |      |      |      |      |      | G   | FRTN | 1     |    |    |     |            |      |      |      |      | TTT  |   |
| Indo (3)  |          |      |      |      |      |      |      |      |      |      |      | G   | FRTN |       |    |    |     |            |      |      |      |      | TTT  |   |
| Indo (3)  | A        |      |      |      |      |      |      |      |      |      |      | G   | FRTN |       |    |    |     |            |      |      |      |      | TTT  |   |
| Indo (2)  | A        |      |      |      |      |      |      |      |      |      |      | G   | FRTN |       |    |    |     |            |      |      |      |      | TTT  |   |
| Indo (5)  | C        |      |      | T    | T    |      |      |      |      |      |      | G   | FRTN |       |    |    |     |            |      |      |      |      |      | A |
| Indo (1)  | D        |      |      |      |      |      |      |      |      |      |      | G   | FRTN |       |    |    |     |            |      |      |      |      |      |   |
| Van (1)   | B        |      |      |      |      | G    |      |      |      |      |      | G   | FRTN | 2     |    |    |     |            |      |      |      |      |      |   |
| Van (1)   | B        |      |      |      |      |      |      |      |      |      |      | G   | LRTT | 2     |    |    | F   |            |      |      |      |      |      |   |
| Van (3)   | A        |      |      |      |      |      |      |      |      |      |      | G   | FRMT | 2     |    |    |     |            |      |      |      |      |      |   |
| Van (3)   | B        |      |      |      |      |      |      |      |      |      |      | G   | FRMT | 2     |    |    |     |            |      |      |      |      |      |   |
| Van (1)   | ND       |      |      |      |      |      |      |      |      |      |      | G   | FRMT | 2     |    |    |     |            |      |      |      |      |      |   |
| Indo (7)  | A        |      |      |      |      |      | A    |      |      |      |      | G   | LRMT |       |    |    |     |            |      |      |      |      | TTT  |   |
| Indo (3)  | A        |      |      |      |      |      | A    |      |      |      |      | G   | LRMT | 2     |    |    |     |            |      |      |      |      | TTT  |   |
| Indo (1)  | ND       |      |      |      |      |      | A    |      |      |      |      | G   | LRMT | 2     |    |    |     |            |      |      |      |      | TTT  |   |
| Indo (1)  | A        |      |      |      |      |      |      |      |      |      |      | G   | LRMT | 2     |    |    |     |            |      |      |      |      |      |   |
| PNG (1)   | A        |      |      |      |      |      | A    |      |      |      |      | G   | LRMT | 3     |    |    |     |            |      |      |      |      |      |   |
| PNG (4)   | A        |      |      |      |      |      |      |      |      |      |      | G   | LRMT | 3     |    |    |     |            |      |      |      |      |      |   |
| PNG (1)   | B        |      |      |      |      |      |      |      |      |      |      | G   | LRMT | 3     |    |    |     |            |      |      |      |      |      |   |
| Thai (3)  | A        |      |      |      |      |      |      |      |      |      |      | G   | LRMT |       |    |    |     |            |      |      |      |      | T    |   |
| Thai (17) | A        |      |      |      |      |      |      |      |      |      |      | G   | LRMT |       |    |    |     |            |      |      |      |      | T    |   |

- Legend
- WT
  - 117N
  - 57L (171A)/58R
  - 57L (171C)/58R (174A)
  - 58R (174A)/117N
  - 58R (172C)/117N
  - 58R (174G)/117N
  - 57L (171C)/58R/117T
  - 58R/61M/117T
  - 57L (169C)/58R/61M/117T
  - 57L (171C)/58R/61M/117T
  - 57L (171A)/58R/61M/117T
  - 57L (171A, 169A)/58R/61M/117T
